# Supplementary material
Source: publisher figshare collection journal article supplement (https://frontiersin.figshare.com/ndownloader/files/12903437)
Supplement: Supplementary file [file 12903437]

**Table S3. List of cultivable species** \*indicated in Creevey, Kelly et al. 2014

| Organism                                                      | Origin of reference isolate | Reference                          | Detected in our rumen sample |
|---------------------------------------------------------------|-----------------------------|------------------------------------|------------------------------|
| <i>Acinetobacter johnsonii</i>                                | Duodenum                    | ATCC 17909                         | +                            |
| <i>Alkaliphilus transvaalensis</i>                            | mine water                  | ATCC 700919                        | +                            |
| <i>Bacillus asahii</i>                                        | soil                        | JCM 5838                           | +                            |
| <i>Bacillus thermoamylovorans</i>                             | compost reactor             | DSM 28918                          | +                            |
| <i>Bacteroides uniformis</i>                                  | human feces                 | ATCC 8492                          |                              |
| <i>Bifidobacterium adolescentis</i>                           | bovine                      | DSM 20087 (*)                      |                              |
| <i>Bifidobacterium pseudolongum</i>                           | rumen/bovine/rumen          | DSM 20096, JCM7092, ATCC 25864 (*) | +                            |
| <i>Blautia producta</i>                                       | human feces                 | DSM 2950                           | +                            |
| <i>Clostridium butyricum</i>                                  | swine intestine             | ATCC 19398                         | +                            |
| <i>Clostridium intestinale</i>                                | cat feces                   | ATCC 49213                         |                              |
| <i>Clostridium neonatale</i>                                  | human blood                 | ATCC BAA-265                       | +                            |
| <i>Clostridium subterminale</i>                               | Anaerobic sewage sludge     | ATCC 29748                         |                              |
| <i>Clostridium tetani</i>                                     | sheep                       | ATCC 454                           | +                            |
| <i>Clostridium thermopalmarium</i>                            | Palm wine                   | ATCC 51427                         | +                            |
| <i>Corynebacterium simulans</i>                               | human lymph node            | ATCC BAA-15                        | +                            |
| <i>Enhydrobacter aerosaccus</i>                               | fresh water                 | ATCC 27094                         | +                            |
| <i>Enterobacter cowanii</i>                                   | Blood                       | JCM 10956                          |                              |
| <i>Enterococcus asini</i>                                     | Donkey caecum               | ATCC 700915                        |                              |
| <i>Enterococcus casseliflavus</i>                             | plant material              | ATCC 25788                         | +                            |
| <i>Enterococcus cecorum</i>                                   | Chicken caecum              | ATCC 43198                         | +                            |
| <i>Enterococcus haemoperoxidus</i>                            | service water               | ATCC BAA-382                       |                              |
| <i>Erwinia oleae</i>                                          | Olive tree                  | DSM 23412                          |                              |
| <i>Eubacterium cylindroides</i>                               | human feces                 | ATCC 27805                         | +                            |
| <i>Janthinobacterium lividum</i>                              | soil                        | ATCC 14273                         | +                            |
| <i>Lactobacillus agilis</i>                                   | Chicken/swine intestine     | JCM 1048, BCM 1049                 | +                            |
| <i>Micrococcus luteus</i>                                     | clinical isolate            | ATCC 49732                         | +                            |
| <i>Paenibacillus barengoltzii</i>                             | Equipment                   | ATCC BAA-1209                      | +                            |
| <i>Paenibacillus lautus</i>                                   | Human intestine             | ATCC 43898                         | +                            |
| <i>Paenibacillus lentimorbus</i>                              | beetle                      | ATCC 14707                         |                              |
| <i>Paenibacillus macerans</i>                                 | potato                      | ATCC 8509                          | +                            |
| <i>Prevotella copri</i>                                       | human feces                 | DSM 18205                          | +                            |
| <i>Prevotella ruminicola</i>                                  | bovine                      | ATCC 19189 (*)                     | +                            |
| <i>Providencia stuartii</i>                                   | clinical isolate            | ATCC 49809                         |                              |
| <i>Pseudomonas veronii</i>                                    | mineral water               | ATCC 700474                        | +                            |
| <i>Roseburia faecis</i>                                       | human feces                 | DSM 16840                          |                              |
| <i>Sharpea azabuensis</i>                                     | bovine                      | DSM 20406 (*)                      | +                            |
| <i>Staphylococcus sciuri</i>                                  | squirrel skin               | DSM 20345                          | +                            |
| <i>Streptococcus agalactiae</i>                               | milk                        | ATCC 13813                         | +                            |
| <i>Streptococcus alactolyticus</i>                            | swine intestine             | ATCC 43077                         |                              |
| <i>Streptococcus luteciae</i>                                 | human isolate               | LMG 22271                          | +                            |
| <i>Streptococcus minor</i>                                    | cat tonsil                  | LMG 14394                          |                              |
| <i>Tetragenococcus halophilus</i>                             | degraded sugar thick juice  | DSM 23766                          | +                            |
| <i>Trabulsiella farmeri</i><br>( <i>Citrobacter farmeri</i> ) | human feces                 | ATCC 51633                         |                              |
| <i>Veillonella parvula</i>                                    | intestinal tract            | DSM 2008                           |                              |
| <i>Virgibacillus pantothenicus</i>                            | Soil                        | ATCC 14576                         | +                            |
